# Supplementary material
Source: publisher figshare collection journal article supplement (https://aacr.figshare.com/articles/dataset/_/22429939)
Supplement: Supplementary file 1 [file 39876277]

Fig S5.

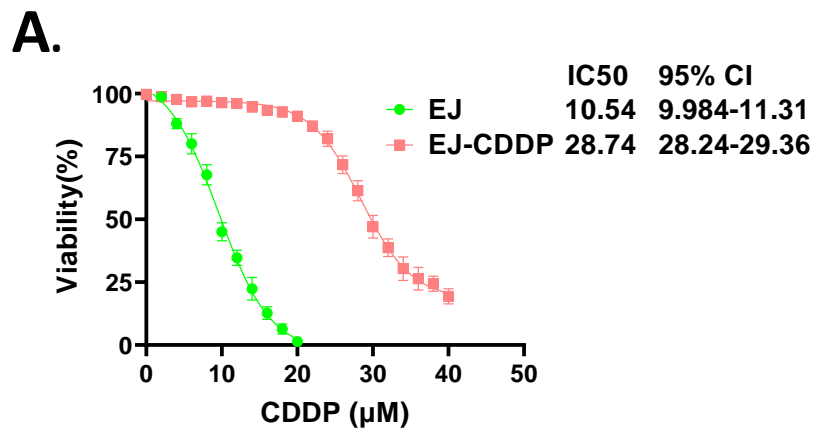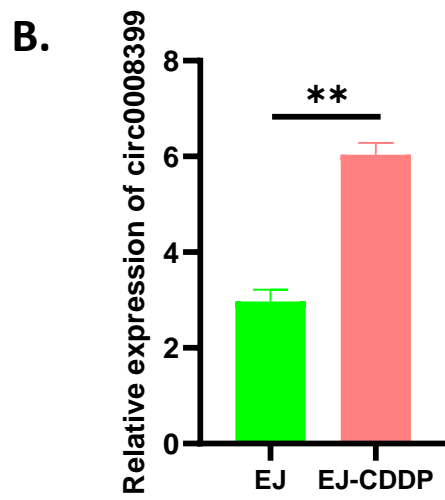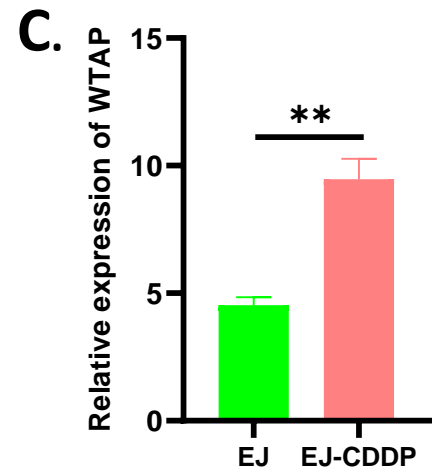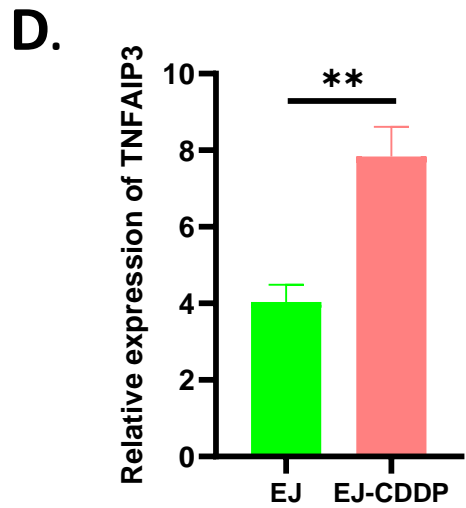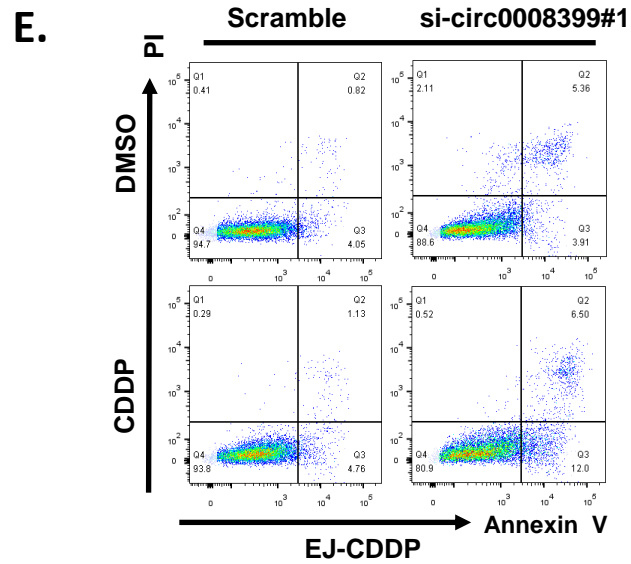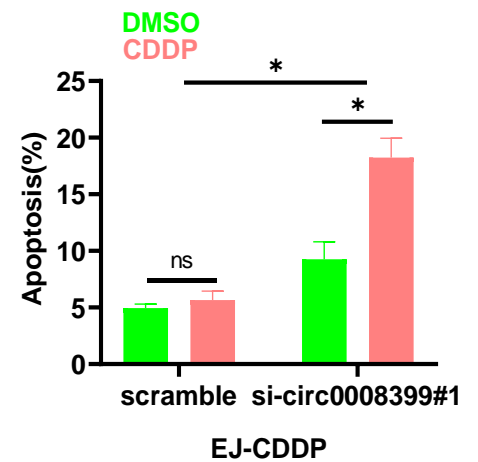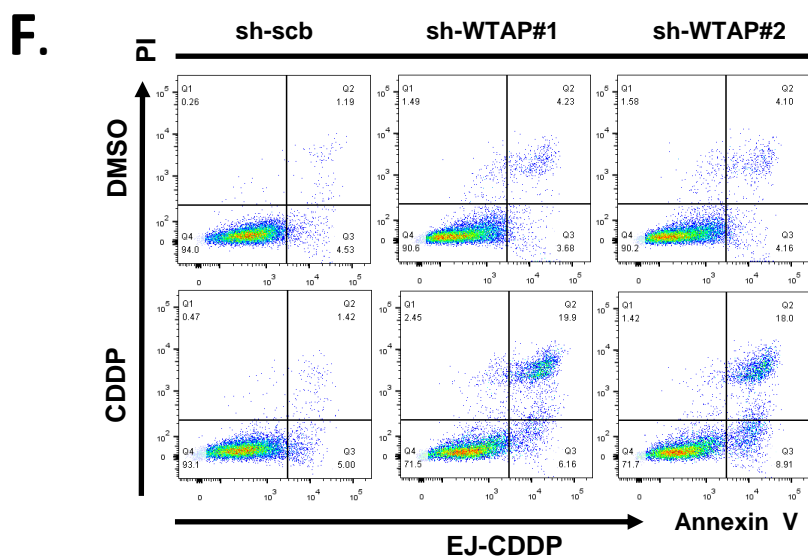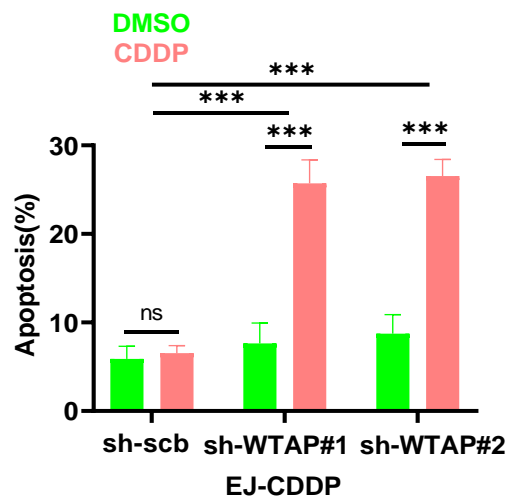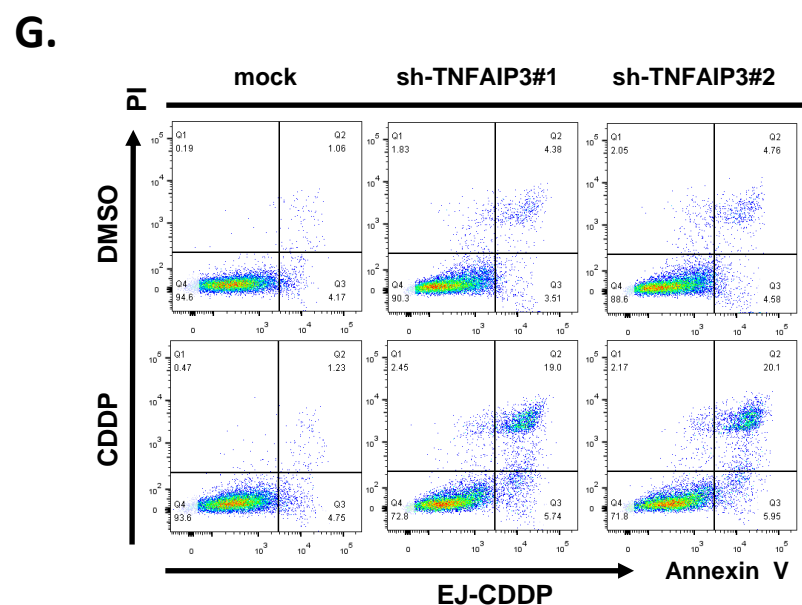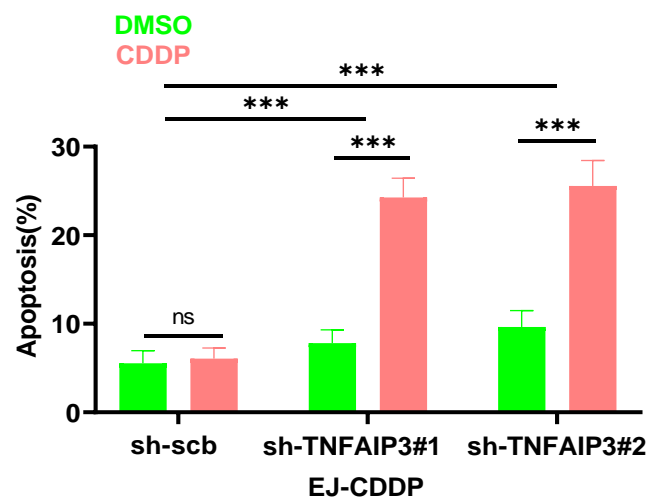

**Supplementary Fig.5 Knockdown of circ0008399/WTAP/TNFAIP3 axis sensitizes EJ-CDDP resistant cells to CDDP-induced apoptosis.**

- (A) CCK-8 assays revealed the IC<sub>50</sub> values of EJ and EJ-CDDP cells upon CDDP treatment 24 h .
- (B) qRT-PCR showed the expression of circ0008399 in EJ-CDDP and its parental control cells.
- (C) qRT-PCR showed the expression of WTAP in EJ-CDDP and its parental control cells.
- (D) qRT-PCR showed the expression of TNFAIP3 in EJ-CDDP and its parental control cells.
- (E) EJ-CDDP cells were transfected with scramble or si-circ0008399#1. After EJ-CDDP cells were treated for 24 h in the absence or presence of CDDP (5 μM), cell apoptosis was measured by flow cytometry assay.
- (F) EJ-CDDP cells were transfected with sh-scb, sh-WTAP#1 or sh-WTAP#2. After EJ-CDDP cells were treated for 24 h in the absence or presence of CDDP (5 μM), cell apoptosis was measured by flow cytometry analysis.
- (G) EJ-CDDP cells were transfected with mock, sh-TNFAIP3#1 or sh-TNFAIP3#2. After EJ-CDDP cells were treated for 24 h in the absence or presence of CDDP (5 μM), cell apoptosis was measured by flow cytometry analysis. Data are presented as the means ± SD from three independent experiments. \*P < 0.05; \*\*P < 0.01; \*\*\*P < 0.001 (Student's t test)
